# Supplementary material
Source: PubMed Central journal article supplement (PMC4427624)
Supplement: NIHMS578909-supplement-01.pdf [file NIHMS578909-supplement-01.pdf]

## Supplemental Table 1

### Multivariable Logistic Regression Model for Echocardiographic CRT Response Including Only Pre-Procedure CMR Parameters

| Model Variable                          | OR (95% CI)         | Wald $\chi^2$ | P-value |
|-----------------------------------------|---------------------|---------------|---------|
| CURE (per 0.1 decrease)                 | 3.00 (1.69-5.33)    | 14.1          | <0.0001 |
| Lead Position Not in Scar               | 13.9 (2.45-79.1)    | 8.84          | 0.003   |
| Mechanical Stretch at LVLVP*            | 7.38 (1.37-39.7)    | 5.42          | 0.02    |
| LVMI (per 10 g/m <sup>2</sup> increase) | 0.625 (0.422-0.926) | 5.49          | 0.02    |

*Max rescaled  $R^2=0.72$ , AUC 0.94 ( $p<0.001$ )*

*\*Equivalent to Delayed E<sub>CC</sub> Onset*

## Supplemental Table 2

### Multivariable Linear Regression Model for Percent Change in LVESV Including Only Pre-Procedure CMR Parameters

| Alternative Model Variable  | Model Coefficient | Standard Error | P-value | Standardized Coefficient |
|-----------------------------|-------------------|----------------|---------|--------------------------|
| Intercept                   | -0.550            | 0.118          | <0.0001 | 0                        |
| CURE (0-1)                  | 0.662             | 0.104          | <0.0001 | 0.547                    |
| Lead Position Not in Scar   | -0.116            | 0.0470         | 0.02    | -0.208                   |
| Mechanical Stretch at LVLP* | -0.100            | 0.0473         | 0.04    | -0.182                   |
| LVMI                        | -0.00227          | 0.00105        | 0.04    | 0.182                    |

$R^2 = 0.53$ ;  $Adjusted R^2 = 0.50$

\*Equivalent to Delayed ECC Onset
